# Supplementary material for: Genome-Wide Identification and Characterization of the Abiotic-Stress-Responsive LACS Gene Family in Soybean (Glycine max)
Source: MDPI journal article supplement (doi:10.3390/agronomy12071496), 2022-06-22
Supplement: s1 [file s1]

Table S1. All primers used for qRT-PCR analysis.

| Name         | Sequence                 |
|--------------|--------------------------|
| GmLACS1-q-F  | TTATATGCCATGCAGAGGTCTC   |
| GmLACS1-q-R  | AACTTCTTGCTTTTGTTCAGGG   |
| GmLACS2-q-F  | CGAAAACAAGCATCTTCGCTAA   |
| GmLACS2-q-R  | TAGCACAAGTACCTGTTAGAGC   |
| GmLACS3-q-F  | CAAAGTGACTGCTGAGAGAAAC   |
| GmLACS3-q-R  | GTAAGAGTTTGGGAACGGAAAC   |
| GmLACS4-q-F  | ATATGCATGTGATTGAGCTTGC   |
| GmLACS4-q-R  | CGTAGCTAGCTATCCATGCATA   |
| GmLACS5-q-F  | GATCAGCAATATGAACGCCTAC   |
| GmLACS5-q-R  | GTGAATCGAAGCGGTGATTG     |
| GmLACS6-q-F  | GTTCTTGCTGGAAGATGTTTCAG  |
| GmLACS6-q-R  | GTCCTCCTGCAGAAGATACTTT   |
| GmLACS7-q-F  | GCGTGGAGAAAGTATGTTTGTT   |
| GmLACS7-q-R  | CAAAC TTTCGGGGTAACTTAGC  |
| GmLACS8-q-F  | GAAGGTTACTTACGGGTGGTTA   |
| GmLACS8-q-R  | ATGGAACCATTCATCGATCAGA□  |
| GmLACS9-q-F  | GCTTGACAGCGAAAATAAATGC   |
| GmLACS9-q-R  | TGTTGTCGAAAGGCCTTTAAAG   |
| GmLACS10-q-F | CTTTCAGCTCAACCAACTCTTC   |
| GmLACS10-q-R | TGAGTGGGGATTCGATTGTAA    |
| GmLACS11-q-F | GTATGCTATACTCATCGGTGCT   |
| GmLACS11-q-R | TACCTTTGTGGGTACGATGAAA   |
| GmLACS12-q-F | GTCGTTTGAGAAGCTTCACTTG   |
| GmLACS12-q-R | TCACTGTTGTAACCTCTGTCTC   |
| GmLACS13-q-F | CGCAACAACAATTCCAAGAAAC   |
| GmLACS13-q-R | CGAACACTCTGTCGTACGATAG   |
| GmLACS14-q-F | TTCTTGCGTGTTACTTCTTGTG   |
| GmLACS14-q-R | CTTGTTAACTCGGGGTTTTTGT   |
| GmLACS15-q-F | TAGCTTCACCAAAC TTTTGCAG  |
| GmLACS15-q-R | TCAGCTGTGATTTCTGTGTTTG   |
| GmLACS16-q-F | GTGGGTCTAGTTCAGTTGGTTA   |
| GmLACS16-q-R | GCAAAAATTCATGTTACAGCC    |
| GmLACS17-q-F | AGGAACTTGACTATACCTTGCC   |
| GmLACS17-q-R | TTTTTCGAGCATTACGTACTGC□  |
| actin4-q-F   | GTTTCAAGCTCTTGCTCGTAATCA |
| actin4-q-R   | GTGTCAGCCATACTGTCCCCATTT |
