# Supplementary material for: Genome-Wide Identification and Characterization of the Abiotic-Stress-Responsive LACS Gene Family in Soybean (Glycine max)
Source: MDPI journal article supplement (doi:10.3390/agronomy12071496), 2022-06-22
Supplement: s1 [file s1]

Table S4. Intraspecific homologous pairs of soybean

| <b>Chromosome Name</b> | <b>Chromosome Location</b> |          | <b>Chromosome Name</b> | <b>Chromosome Location</b> |          | <b>Highlight</b> |
|------------------------|----------------------------|----------|------------------------|----------------------------|----------|------------------|
| 1                      | 55393888                   | 55402683 | 11                     | 1237244                    | 1244658  | 255.0.0          |
| 1                      | 55393888                   | 55402683 | 5                      | 39686415                   | 39694722 | 255.0.0          |
| 1                      | 55393888                   | 55402683 | 8                      | 1804529                    | 1809441  | 255.0.0          |
| 2                      | 986605                     | 994410   | 3                      | 42444455                   | 42450813 | 255.0.0          |
| 5                      | 39686415                   | 39694722 | 8                      | 1804529                    | 1809441  | 255.0.0          |
| 10                     | 1022364                    | 1029001  | 19                     | 47093791                   | 47099850 | 255.0.0          |
| 10                     | 1022364                    | 1029001  | 2                      | 986605                     | 994410   | 255.0.0          |
| 10                     | 1022364                    | 1029001  | 3                      | 42444455                   | 42450813 | 255.0.0          |
| 11                     | 9336389                    | 9344401  | 12                     | 3430200                    | 3438358  | 255.0.0          |
| 11                     | 1237244                    | 1244658  | 5                      | 39686415                   | 39694722 | 255.0.0          |
| 11                     | 9336389                    | 9344401  | 7                      | 21342027                   | 21348662 | 255.0.0          |
| 11                     | 1237244                    | 1244658  | 8                      | 1804529                    | 1809441  | 255.0.0          |
| 12                     | 3430200                    | 3438358  | 7                      | 21342027                   | 21348662 | 255.0.0          |
| 13                     | 18635540                   | 18644868 | 14                     | 32271989                   | 32301104 | 255.0.0          |
| 13                     | 2735552                    | 2746104  | 20                     | 18426690                   | 18438224 | 255.0.0          |
| 13                     | 18635540                   | 18644868 | 6                      | 9174373                    | 9179970  | 255.0.0          |
| 14                     | 32271989                   | 32301104 | 6                      | 9174373                    | 9179970  | 255.0.0          |
| 19                     | 47093791                   | 47099850 | 2                      | 986605                     | 994410   | 255.0.0          |
| 19                     | 47093791                   | 47099850 | 3                      | 42444455                   | 42450813 | 255.0.0          |
| 20                     | 734922                     | 741835   | 7                      | 21342027                   | 21348662 | 255.0.0          |
