# Supplementary material for: Genome-Wide Identification and Characterization of the Abiotic-Stress-Responsive LACS Gene Family in Soybean (Glycine max)
Source: MDPI journal article supplement (doi:10.3390/agronomy12071496), 2022-06-22
Supplement: s1 [file s1]

Table S3. Protein physicochemical properties and supplementary information of Gn

| <b>Gene Name</b> | <b>Orientation</b> | <b>Intron Number</b> | <b>Total number of atoms</b> | <b>Formula</b>                                                                         | <b>GRAVY</b> |
|------------------|--------------------|----------------------|------------------------------|----------------------------------------------------------------------------------------|--------------|
| GmLACS1          | reverse            | 19                   | 10650                        | C <sub>3419</sub> H <sub>5341</sub> N <sub>881</sub> O <sub>982</sub> S <sub>27</sub>  | -0.164       |
| GmLACS2          | forward            | 19                   | 10493                        | C <sub>3360</sub> H <sub>5264</sub> N <sub>868</sub> O <sub>967</sub> S <sub>34</sub>  | -0.215       |
| GmLACS3          | reverse            | 19                   | 10480                        | C <sub>3355</sub> H <sub>5248</sub> N <sub>880</sub> O <sub>963</sub> S <sub>34</sub>  | -0.194       |
| GmLACS4          | reverse            | 19                   | 10496                        | C <sub>3362</sub> H <sub>5247</sub> N <sub>871</sub> O <sub>982</sub> S <sub>34</sub>  | -0.204       |
| GmLACS5          | forward            | 11                   | 10746                        | C <sub>3393</sub> H <sub>5402</sub> N <sub>926</sub> O <sub>997</sub> S <sub>28</sub>  | -0.066       |
| GmLACS6          | forward            | 19                   | 10358                        | C <sub>3312</sub> H <sub>5168</sub> N <sub>868</sub> O <sub>976</sub> S <sub>34</sub>  | -0.197       |
| GmLACS7          | forward            | 19                   | 10515                        | C <sub>3373</sub> H <sub>5274</sub> N <sub>868</sub> O <sub>967</sub> S <sub>33</sub>  | -0.220       |
| GmLACS8          | forward            | 19                   | 10453                        | C <sub>3352</sub> H <sub>5242</sub> N <sub>864</sub> O <sub>966</sub> S <sub>29</sub>  | -0.153       |
| GmLACS9          | forward            | 19                   | 10328                        | C <sub>3319</sub> H <sub>5140</sub> N <sub>864</sub> O <sub>970</sub> S <sub>35</sub>  | -0.223       |
| GmLACS10         | forward            | 19                   | 10323                        | C <sub>3313</sub> H <sub>5133</sub> N <sub>861</sub> O <sub>981</sub> S <sub>35</sub>  | -0.229       |
| GmLACS11         | forward            | 11                   | 11244                        | C <sub>3591</sub> H <sub>5641</sub> N <sub>941</sub> O <sub>1045</sub> S <sub>26</sub> | -0.107       |
| GmLACS12         | reverse            | 11                   | 10773                        | C <sub>3415</sub> H <sub>5416</sub> N <sub>912</sub> O <sub>1005</sub> S <sub>25</sub> | -0.021       |
| GmLACS13         | forward            | 13                   | 10023                        | C <sub>3198</sub> H <sub>5023</sub> N <sub>845</sub> O <sub>935</sub> S <sub>22</sub>  | 0.016        |
| GmLACS14         | reverse            | 19                   | 10501                        | C <sub>3361</sub> H <sub>5255</sub> N <sub>883</sub> O <sub>966</sub> S <sub>36</sub>  | -0.231       |
| GmLACS15         | forward            | 19                   | 10359                        | C <sub>3312</sub> H <sub>5169</sub> N <sub>871</sub> O <sub>974</sub> S <sub>33</sub>  | -0.208       |
| GmLACS16         | reverse            | 11                   | 11271                        | C <sub>3601</sub> H <sub>5659</sub> N <sub>935</sub> O <sub>1049</sub> S <sub>27</sub> | -0.077       |
| GmLACS17         | reverse            | 11                   | 10492                        | C <sub>3347</sub> H <sub>5260</sub> N <sub>876</sub> O <sub>984</sub> S <sub>25</sub>  | -0.092       |

iLACSS

| <b>Total number of<br/>negatively<br/>charged<br/>residues<br/>(Asp+Glu)</b> | <b>Total number of<br/>negatively<br/>charged<br/>residues<br/>(Asp+Glu)</b> | <b>Alpha<br/>helix<br/>(%)</b> | <b>Beta<br/>turn<br/>(%)</b> | <b>Extended<br/>strand<br/>(%)</b> | <b>Random<br/>coil (%)</b> | <b>Signal<br/>peptide</b> |
|------------------------------------------------------------------------------|------------------------------------------------------------------------------|--------------------------------|------------------------------|------------------------------------|----------------------------|---------------------------|
| 81                                                                           | 80                                                                           | 36.81                          | 8.35                         | 18.63                              | 36.21                      | 0.0007                    |
| 86                                                                           | 83                                                                           | 37.88                          | 7.58                         | 18.48                              | 36.06                      | 0.0010                    |
| 82                                                                           | 80                                                                           | 39.12                          | 8.46                         | 18.43                              | 33.99                      | 0.0013                    |
| 81                                                                           | 75                                                                           | 38.35                          | 7.67                         | 18.20                              | 35.79                      | 0.0008                    |
| 78                                                                           | 82                                                                           | 38.76                          | 6.77                         | 17.87                              | 36.60                      | 0.5552                    |
| 81                                                                           | 76                                                                           | 39.24                          | 8.64                         | 18.33                              | 33.79                      | 0.0008                    |
| 86                                                                           | 84                                                                           | 38.64                          | 7.73                         | 18.79                              | 34.85                      | 0.0017                    |
| 78                                                                           | 80                                                                           | 38.61                          | 8.30                         | 17.35                              | 35.75                      | 0.0010                    |
| 74                                                                           | 69                                                                           | 37.96                          | 8.54                         | 19.51                              | 33.99                      | 0.0011                    |
| 81                                                                           | 69                                                                           | 38.73                          | 7.62                         | 17.99                              | 35.67                      | 0.0013                    |
| 82                                                                           | 84                                                                           | 39.72                          | 6.34                         | 17.52                              | 36.41                      | 0.0006                    |
| 86                                                                           | 78                                                                           | 40.66                          | 7.04                         | 18.82                              | 33.48                      | 0.3203                    |
| 78                                                                           | 69                                                                           | 40.19                          | 6.80                         | 18.86                              | 34.16                      | 0.5097                    |
| 85                                                                           | 81                                                                           | 38.97                          | 7.85                         | 18.88                              | 34.29                      | 0.0013                    |
| 80                                                                           | 76                                                                           | 39.24                          | 8.48                         | 18.48                              | 33.79                      | 0.0009                    |
| 84                                                                           | 83                                                                           | 40.69                          | 6.62                         | 17.93                              | 34.76                      | 0.0006                    |
| 80                                                                           | 77                                                                           | 37.69                          | 7.86                         | 19.14                              | 35.31                      | 0.0016                    |

| Transmembrane structure |
|-------------------------|
| 0                       |
| 0                       |
| 0                       |
| 0                       |
| 0                       |
| 0                       |
| 0                       |
| 0                       |
| 0                       |
| 1                       |
| 0                       |
| 0                       |
| 0                       |
| 0                       |
| 1                       |
| 0                       |
