# Supplementary material for: Genome-Wide Identification and Characterization of the Abiotic-Stress-Responsive LACS Gene Family in Soybean (Glycine max)
Source: MDPI journal article supplement (doi:10.3390/agronomy12071496), 2022-06-22
Supplement: s1 [file s1]

Table S2. The gene ID of LACS genes used in this study

| <b>Gene Name</b> | <b>Gene ID</b> |
|------------------|----------------|
| ZmLACS1          | Zm00001d043851 |
| ZmLACS2          | Zm00001d044016 |
| ZmLACS3          | Zm00001d052485 |
| ZmLACS4          | Zm00001d053009 |
| ZmLACS5          | Zm00001d053127 |
| ZmLACS6          | Zm00001d045295 |
| ZmLACS7          | Zm00001d023238 |
| ZmLACS8          | Zm00001d023538 |
| ZmLACS9          | Zm00001d024723 |
| <b>Gene Name</b> | <b>Gene ID</b> |
| GhLACS1          | Gh_A07G1181    |
| GhLACS2          | Gh_D07G1281    |
| GhLACS3          | Gh_A01G1527    |
| GhLACS4          | Gh_D01G1776    |
| GhLACS5          | Gh_A02G0997    |
| GhLACS6          | Gh_A11G0227    |
| GhLACS7          | Gh_D03G0744    |
| GhLACS8          | Gh_D11G0240    |
| GhLACS9          | Gh_A01G0167    |
| GhLACS10         | Gh_D01G0214    |
| GhLACS11         | Gh_D01G0215    |
| GhLACS12         | Gh_A07G0795    |
| GhLACS13         | Gh_D07G0857    |
| GhLACS14         | Gh_A06G0374    |
| GhLACS15         | Gh_D05G2232    |
| GhLACS16         | Gh_D06G0402    |
| GhLACS17         | Gh_A05G3732    |
