# Supplementary figures and images for: Genome-Wide Identification and Characterization of the Abiotic-Stress-Responsive LACS Gene Family in Soybean (Glycine max)
Source: MDPI journal article supplement (doi:10.3390/agronomy12071496), 2022-06-22

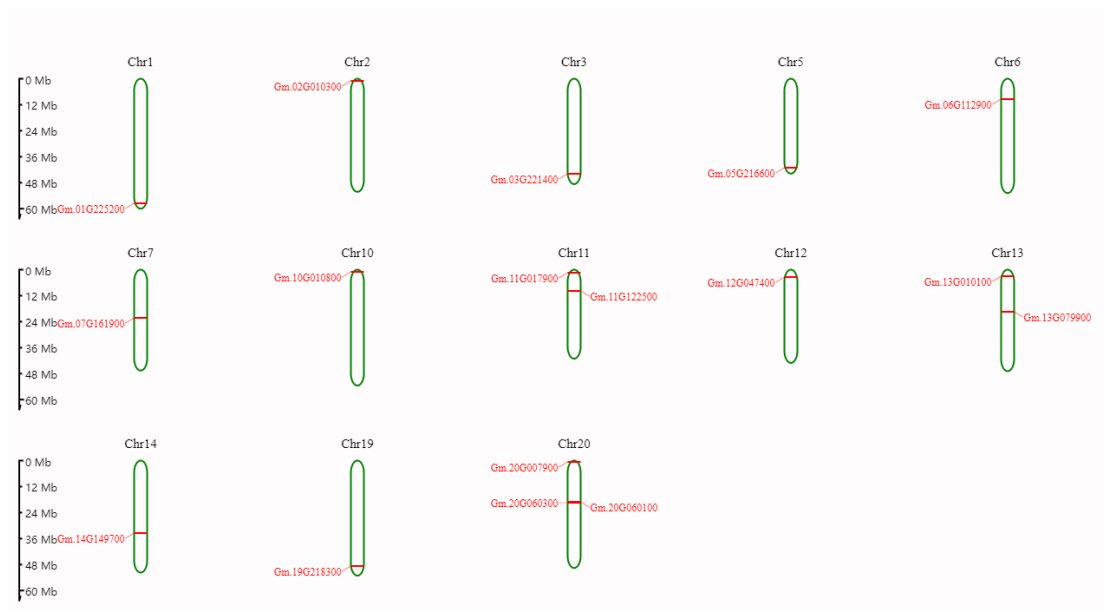

Figure S1. Chromosome distribution of *LACS* genes in soybean

Supplement: s1 [file s1]
